# Supplementary material for: Versatile transgenic multistage effector-gene combinations for Plasmodium falciparum suppression in Anopheles
Source: PubMed Central journal article supplement — Sci Adv. 2020 May 13;6(20):eaay5898. doi: 10.1126/sciadv.aay5898 (PMC7220273; doi:10.1126/sciadv.aay5898), 2020-05-13
Supplement: aay5898_SM.pdf [file aay5898_SM.pdf]

advances.sciencemag.org/cgi/content/full/6/20/eaay5898/DC1

## Supplementary Materials for

### **Versatile transgenic multistage effector-gene combinations for *Plasmodium falciparum* suppression in *Anopheles***

Yuemei Dong, Maria L. Simões, George Dimopoulos\*

\*Corresponding author Email: [gdimopou@jhsph.edu](mailto:gdimopou@jhsph.edu)

Published 13 May 2020, *Sci. Adv.* **6**, eaay5898 (2020)  
DOI: 10.1126/sciadv.aay5898

#### **This PDF file includes:**

Fig. S1  
Tables S1 to S3  
Supporting text

## Supplementary Materials

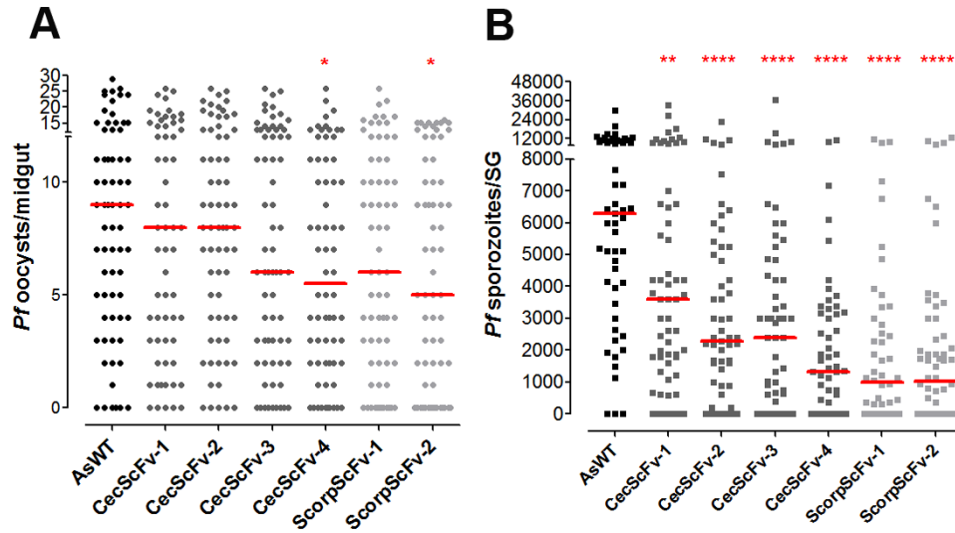

**Fig. S1. *P. falciparum* infection oocyst and sporozoite loads of the heterozygous transgenic ScFv lines.** (A-B) *P. falciparum* (NF54) oocyst or sporozoite infection intensities of individual CecScFv and ScorpScFv transgenic lines at 8 dpi in the gut (A) or 14 days dpi in the salivary glands (SG) (B) with additional naïve blood meals at day 5 and 9 post-infectious blood meal (PIBM). Assays were performed with at least two biological replicates. Each dot represents the number of parasites in an individual midgut or salivary glands, and the horizontal lines (red) indicate the median values. Mann-Whitney test was used to calculate *p*-values and determine the significance of parasite numbers.

**Table S1.** Primers used for the generation of constructs for embryo microinjections to generate transgenic mosquitoes, verification of transgenes on the transgenic mosquito chromosome, and qRT-PCR expression analysis primers for the transgenes, bacterial ribosomal gene *16S* primers to measure the bacterial loads, and the primers for expression profiling of endogenous effector genes.

| Name                      | Primer Name    | Primer sequence                                           | RE sites, Notes   |
|---------------------------|----------------|-----------------------------------------------------------|-------------------|
| <b>AgCp promoter</b>      | AgCp-Pro-F     | GATC <u>GGCCGGCC</u> AGGAGGCATGTCATA<br>AGC               | <u>FseI</u>       |
|                           | AgCp-Pro-R     | TGGATCCGCTCGGCCGCTTC                                      |                   |
| <b>AsVg promoter</b>      | AsVg-Pro-F     | gg <u>GGCGGCCT</u> GTACATGGTAAAGCAAT                      | <u>AscI</u>       |
|                           | AsVg-Pro-R     | GGTTCGGTTGTTCTCAGATGC                                     |                   |
| <b>AsVg-3'UTR full</b>    | AsVg-5'UTR-F   | TGTACATGGTAAAGCAAT                                        |                   |
|                           | AsVg-3'UTR-R   | AGCCGGAGGAGGTCACCTTA                                      |                   |
| <b>Trypsin Terminator</b> | Tryp-Ter-F     | TGAATACTAGTTAGGTAGCTGAGCGCAT<br>GCGATCTC                  | <u>SpeI</u>       |
|                           | Tryp-Ter-R     | TAAGTGCGGCCGCG <u>GGCCGGCC</u> GGTTCGG<br>CGCGCCACCCTTGAG | <u>NotI, FseI</u> |
| <b>MultiEff-veri</b>      | MultiEff-F     | GCCATCCTGGCGGTGGCGCTC                                     |                   |
|                           | MultiEff-R     | ACCCACCGCACGCGCATCGCC                                     |                   |
| <b>CecC-ScFv-veri</b>     | CecCScFv-F     | ATGAACTTCACCAAGCTGTTC                                     |                   |
|                           | CecCScFv-R     | TCGTTCTCAGGTTGTTGATCT                                     |                   |
| <b>PLA2-ScFv-veri</b>     | PLA2ScFv-F     | GTTTAAACATGCAAGTCGTTT                                     |                   |
|                           | PLA2ScFv-R     | ACTAGTTTGGTACACTTTTCG                                     |                   |
| <b>Scorp-ScFv-veri</b>    | ScorpScFv-F    | ATGAACTTCTCCAAGATCTTC                                     |                   |
|                           | ScorpScFv-R    | ATCCAACCCATCCACTTCAGAC                                    |                   |
| <b>GFP-veri</b>           | GFP-F          | ATGGTGAGCAAGGGCGAGGAGCTGT                                 |                   |
|                           | GFP-R          | TTACTTGTACAGCTCGTCCATGCCG                                 |                   |
| <b>DsRed-veri</b>         | DsRed-F        | ACCGTGAAGCTGAAGGTGACCA                                    |                   |
|                           | DsRed-R        | AGGCCTCCCAGCCCATGGTCT                                     |                   |
| <b>AsS7</b>               | AsS7-F         | TCGGTTCCAAGGTGATCAAAGC                                    | qRT-PCR           |
|                           | AsS7-R         | AGCGCGGTCTCTTCTGCTTGT                                     | qRT-PCR           |
| <b>MultiEff</b>           | RT-MultiEff-F  | GGCATCGGCGCCGTGCTGAAG                                     | qRT-PCR           |
|                           | RT-MultiEff-R  | GATCTTGCCCAGCAGGTAGCC                                     | qRT-PCR           |
| <b>CecC-ScFv</b>          | RT-CecCScFv-F  | ACAGCCGGTAGATGGTGCGCC                                     | qRT-PCR           |
|                           | RT-CecCScFv-R  | ACGGCCTATGTTTCGTGAACC                                     | qRT-PCR           |
| <b>PLA2-ScFv</b>          | RT-PLA2ScFv-F  | GGAGGAACGGATAATATATCC                                     | qRT-PCR           |
|                           | RT-PLA2ScFv-R  | TGCATCCGTGTGCTTGAACCG                                     | qRT-PCR           |
| <b>Scorp-ScFv</b>         | RT-ScorpScFv-F | GATTCAGAAAAAGATTGACGA                                     | qRT-PCR           |

|                 |                |                            |         |
|-----------------|----------------|----------------------------|---------|
|                 | RT-ScorpScFv-R | GCACTGAAATTCGTTCTTGGC      | qRT-PCR |
| <b>16S-rRNA</b> | 16S-qPCR-F     | TCCTACGGGAGGCAGCAGT        | qRT-PCR |
|                 | 16S-qPCR-R     | GGACTACCAGGGTATCTAATCCTGTT | qRT-PCR |
| <b>CEC1</b>     | AsCEC1-qPCR-F  | GGAAGCGGGACGCCTGAA         | qRT-PCR |
|                 | AsCEC1-qPCR-R  | CCTTGACACCTGCCACCACC       | qRT-PCR |
| <b>DEF1</b>     | AsDEF1-qPCR-F  | AGTCGTGGTCCTGGCGGCTCT      | qRT-PCR |
|                 | AsDEF1-qPCR-R  | ACGAGCGATGCAATGCGCGGCA     | qRT-PCR |
| <b>GAM1</b>     | AsGAM1-qPCR-F  | GTACGTCAGCCGGAAGGGAG       | qRT-PCR |
|                 | AsGAM1-qPCR-R  | CGTAATGAACGAGGACGAACAGC    | qRT-PCR |
| <b>FBN9</b>     | AsFBN9-qPCR-F  | AACAATCTGACCGCACTGC        | qRT-PCR |
|                 | AsFBN9-qPCR-R  | TGTGACGCATTCCCTGTAG        | qRT-PCR |

**Table S2.** *P. falciparum* infection data for the MultiEff, PLAScFv, CecScFv, and ScorpScFv transgenic mosquitoes. Additional statistical analysis of *P. falciparum* parasite numbers for **Figs. 1 and 2** (Mann-Whitney test, chi-squared and fisher's exact test).

|                                                              |             |                 |                |                  |
|--------------------------------------------------------------|-------------|-----------------|----------------|------------------|
| <b>Fig. 1F <i>Pf</i> oocysts (medium)</b>                    | <b>AsWT</b> | <b>MultiEff</b> |                |                  |
| n=                                                           | 54          | 63              |                |                  |
| range                                                        | 0-89        | 0-53            |                |                  |
| prevalence                                                   | 88%         | 73%             |                |                  |
| Fisher's exact test p-value                                  |             | 0.0118 (*)      |                |                  |
| median                                                       | 19.0        | 7.5             |                |                  |
| Mann-Whitney test p-value                                    |             | 0.0034 (**)     |                |                  |
| <b>Fig. 1G <i>Pf</i> oocysts (low)</b>                       | <b>AsWT</b> | <b>MultiEff</b> |                |                  |
| n=                                                           | 72          | 57              |                |                  |
| range                                                        | 0-19        | 0-13            |                |                  |
| prevalence                                                   | 83.0%       | 45.0%           |                |                  |
| Fisher's exact test p-value                                  |             | <0.0001 (****)  |                |                  |
| median                                                       | 3.5         | 0.0             |                |                  |
| Mann-Whitney test p-value                                    |             | 0.001 (***)     |                |                  |
| <b>Fig. 1H <i>Pf</i> sporozoites (low)</b>                   | <b>AsWT</b> | <b>MultiEff</b> |                |                  |
| n=                                                           | 54          | 54              |                |                  |
| range                                                        | 0-11206     | 0-11800         |                |                  |
| prevalence                                                   | 75.0%       | 46.0%           |                |                  |
| Fisher's exact test p-value                                  |             | <0.0001 (****)  |                |                  |
| median                                                       | 2300        | 0               |                |                  |
| Mann-Whitney test p-value                                    |             | <0.0001 (****)  |                |                  |
| <b>Fig. 1J <i>Pf</i> oocysts (Aseptic)</b>                   | <b>AsWT</b> | <b>MultiEff</b> |                |                  |
| n=                                                           | 65          | 65              |                |                  |
| range                                                        | 1-65        | 0-38            |                |                  |
| prevalence                                                   | 100%        | 83.0%           |                |                  |
| Fisher's exact test p-value                                  |             | <0.0001 (****)  |                |                  |
| median                                                       | 25.0        | 5.0             |                |                  |
| Mann-Whitney test p-value                                    |             | <0.0001 (****)  |                |                  |
| <b>Fig. 1K <i>Pf</i> oocysts (Septic)</b>                    | <b>AsWT</b> | <b>MultiEff</b> |                |                  |
| n=                                                           | 69          | 78              |                |                  |
| range                                                        | 0-23        | 0-11            |                |                  |
| prevalence                                                   | 77.0%       | 49.0%           |                |                  |
| Fisher's exact test p-value                                  |             | <0.0001 (****)  |                |                  |
| median                                                       | 2.0         | 0.0             |                |                  |
| Mann-Whitney test p-value                                    |             | <0.0001 (****)  |                |                  |
| <b>Fig. 2F <i>Pf</i> oocysts (no additional blood meals)</b> | <b>AsWT</b> | <b>PLAScFv</b>  | <b>CecScFv</b> | <b>ScorpScFv</b> |

|                                                                     |             |                |                |                  |
|---------------------------------------------------------------------|-------------|----------------|----------------|------------------|
| n=                                                                  | 69          | 75             | 60             | 57               |
| range                                                               | 0-45        | 0-27           | 0-35           | 0-32             |
| prevalence                                                          | 88.0%       | 84.0%          | 82.0%          | 83.0%            |
| Chi-square test p-value                                             |             | ns             | ns             | ns               |
| median                                                              | 3.0         | 3.0            | 2.0            | 2.0              |
| Mann-Whitney test p-value                                           |             | 0.2032 (ns)    | 0.2235 (ns)    | 0.0690 (ns)      |
| <b><i>Fig. 2G Pf sporozoites (no additional blood meals)</i></b>    | <b>AsWT</b> | <b>PLAScFv</b> | <b>CecScFv</b> | <b>ScorpScFv</b> |
| n=                                                                  | 63          | 72             | 72             | 72               |
| range                                                               | 0-33563     | 0-33200        | 0-38438        | 0-35000          |
| prevalence                                                          | 84.0%       | 82.0%          | 72.0%          | 73.0%            |
| Chi-square test p-value                                             |             | ns             | ns             | ns               |
| median                                                              | 2719.0      | 2600.0         | 2400.0         | 1875.0           |
| Mann-Whitney test p-value                                           |             | 0.4045 (ns)    | 0.1382 (ns)    | 0.0484 (*)       |
| <b><i>Fig. 2H Pf oocysts (Additional naïve blood meals)</i></b>     | <b>AsWT</b> | <b>PLAScFv</b> | <b>CecScFv</b> | <b>ScorpScFv</b> |
| n=                                                                  | 72          | 72             | 72             | 72               |
| range                                                               | 0-28        | 0-28           | 0-29           | 0-21             |
| prevalence                                                          | 83.0%       | 79.0%          | 77.0%          | 75.0%            |
| Chi-square test p-value                                             |             | ns             | ns             | ns               |
| median                                                              | 8.0         | 7.0            | 7.0            | 6.0              |
| Mann-Whitney test p-value                                           |             | 0.7282 (ns)    | 0.4747 (ns)    | 0.0557 (ns)      |
| <b><i>Fig. 2I Pf sporozoites (Additional naïve blood meals)</i></b> | <b>AsWT</b> | <b>PLAScFv</b> | <b>CecScFv</b> | <b>ScorpScFv</b> |
| n=                                                                  | 54          | 54             | 54             | 54               |
| range                                                               | 0-21000     | 0-24570        | 0-15600        | 0-18500          |
| prevalence                                                          | 85.0%       | 81.0%          | 63.0%          | 50.0%            |
| Chi-square test p-value                                             |             | 0.5727 (ns)    | 0.0004 (***)   | <0.0001 (****)   |
| median                                                              | 6300.0      | 5400.0         | 1230.0         | 967.5            |
| Mann-Whitney test p-value                                           |             | 0.5591 (ns)    | <0.0001 (****) | <0.0001 (****)   |

**Table S3.** *P. falciparum* infection data for the MultiEff, CpRel2, ScorpScFv, and hybrid transgenic lines (Rel2ScFv, MultiEffScFv). Additional statistical analysis of *P. falciparum* parasite numbers for **Fig. 3** (Mann-Whitney test, chi-squared test).

| <b>Fig. 3A (<i>Pf</i> oocysts)</b>     | <b>AsWT</b> | <b>ScorpScFv</b> | <b>CpRel2</b>   | <b>Hybrid (Rel2ScFv)</b>     |
|----------------------------------------|-------------|------------------|-----------------|------------------------------|
| n=                                     | 66          | 66               | 66              | 66                           |
| range                                  | 0-33        | 0-31             | 0-22            | 0-14                         |
| prevalence                             | 87.9%       | 86.4%            | 66.7%           | 66.7%                        |
| Chi-square test p-value                |             | 0.8339 (ns)      | 0.0006 (***)    | 0.0006 (***)                 |
| median                                 | 9.0         | 7.0              | 3.5             | 3.0                          |
| Mann-Whitney test p-value              |             | 0.0113 (*)       | 0.0001 (***)    | <0.0001 (****)               |
| <b>Fig. 3B (<i>Pf</i> sporozoites)</b> | <b>AsWT</b> | <b>ScorpScFv</b> | <b>CpRel2</b>   | <b>Hybrid (Rel2ScFv)</b>     |
| n=                                     | 80          | 80               | 80              | 80                           |
| range                                  | 0-18000     | 0-13800          | 0-18000         | 0-15000                      |
| prevalence                             | 87.5%       | 55.0%            | 66.3%           | 45.0%                        |
| Chi-square test p-value                |             | <0.0001 (****)   | 0.0007 (***)    | <0.0001 (****)               |
| median                                 | 6200.0      | 1770.0           | 2050.0          | 0.0                          |
| Mann-Whitney test p-value              |             | <0.0001 (****)   | <0.0001 (****)  | <0.0001 (****)               |
| p-value (ScorpScFv vs Hybrid)          |             | 0.0186 (*)       |                 |                              |
| p-value (CpRel2 vs Hybrid)             |             |                  | 0.0021 (**)     |                              |
| <b>Fig. 3C (<i>Pf</i> oocysts)</b>     | <b>AsWT</b> | <b>ScorpScFv</b> | <b>MultiEff</b> | <b>Hybrid (MultiEffScFv)</b> |
| n=                                     | 68          | 68               | 68              | 68                           |
| range                                  | 0-17        | 0-17             | 0-12            | 0-12                         |
| prevalence                             | 76.5%       | 66.2%            | 48.5%           | 51.5%                        |
| Chi-square test p-value                |             | 0.2753 (ns)      | <0.0001 (****)  | 0.0004 (***)                 |
| median                                 | 3.5         | 2.0              | 0.0             | 1.0                          |
| Mann-Whitney test p-value              |             | 0.1168 (ns)      | <0.0001 (****)  | 0.0002 (***)                 |
| <b>Fig. 3D (<i>Pf</i> sporozoites)</b> | <b>AsWT</b> | <b>ScorpScFv</b> | <b>MultiEff</b> | <b>Hybrid (MultiEffScFv)</b> |
| n=                                     | 72          | 72               | 72              | 72                           |
| range                                  | 0-12000     | 0-12000          | 0-12000         | 0-13800                      |
| prevalence                             | 75.0%       | 40.3%            | 47.2%           | 36.1%                        |
| Chi-square test p-value                |             | <0.0001 (****)   | <0.0001 (****)  | <0.0001 (****)               |
| median                                 | 3505.0      | 0.0              | 0.0             | 0.0                          |
| Mann-Whitney test p-value              |             | <0.0001 (****)   | <0.0001 (****)  | <0.0001 (****)               |
| p-value (ScorpScFv vs Hybrid)          |             | 0.0215(*)        |                 |                              |
| p-value (MultiEff vs Hybrid)           |             |                  | 0.0223 (*)      |                              |

## Supporting text

Sequences of the synthetic transgenes on the plasmid constructs for the transformation of *Anopheles* mosquito embryos.

Synthesized gene fragment *MultiEff* at GenScript (Inc.) for cloning into the *pUC57-Kan* vector

*Bam*HI ggGGATCC  
*AgCp* sp ATGGCCATCCTGGCGGTGGCGCTCAGTGTGCGAAGCGGCCGAGCGGATCCA  
**Melittin** ggcacgogcogcgtgctgaagtgctgacgacgggocctgcccggccctgatctcgtggatcaagcgcaagcgccagcag  
**P2A** GCCACCAACTTCTCCCTGCTGAAGCAGGCCGGCGACGTGGAGGAGAACCCCGGCCCC  
(**TP10**) 2 gccggctacctgctgggcaagatcaacctgaaggccctggccgocctggccaagaagatcctgggocggcgccggctacctgct  
ggcaagatcaacctgaaggccctggccgocctggccaagaagatcctg

**P2A** GCCACCAACTTCTCCCTGCTGAAGCAGGCCGGCGACGTGGAGGAGAACCCCGGCCCC  
(**EPIP**) 4 Gat aaa tcc ctg gtt aag ggt ccg ggc ccg Gac aaa tgc ctg gtc aaa ggt ccg ggc ccc gat  
aaa agc ctg gtc aag ggc tgc ccg ggc gac aaa tgc ctg gtc aag ggc tgc ccg ggc

**P2A** GCCACCAACTTCTCCCTGCTGAAGCAGGCCGGCGACGTGGAGGAGAACCCCGGCCCC  
Shival Atg ccg cgt tgg cgt ctg ttc cgc cgt atc gac cgc gtt ggc aaa cag att aag cag ggt Att  
ctg cgt gcg ggt ccg gcg att gcg ctg gtt ggc gat gcg cgt gcg gtc ggt

**P2A** GCCACCAACTTCTCCCTGCTGAAGCAGGCCGGCGACGTGGAGGAGAACCCCGGCCCC  
Scorpine Ggc tgg att aac gaa gag aag att cag aaa aag att gac gaa cgg atg ggc aac acg gtc Ctg  
ggt cgc atg gcg aaa gcg att gtg cat aaa atg gcc aag aac gaa ttt cag tgc atg gcg aac  
atg gat atg ctg ggc aat tgc gag aaa cac tgt cag acg agc ggc gaa aaa ggc tac tgt cac  
ggc acc aag tgt aaa tgc ggc acc ccc ctg tct tat

*Xho*I CTAGCGgg

## > *AsVg-Scorp-ScFv-3'UTR*

GGCGCGCCTgtacatggtaaagcaatctgacgatagtgttaacggagtgttgtagattgtaacaggaattcaacgaaacagcagcagggaaatggt  
agcataccaccacctacgacaatattgcgatttgggttgggttttatatatcagagagacatattaagccttaaagtctgagctgacaccaaac  
ggatgggtggaagtgaatagctgtttgtaatttctacttctattctgataataaatcaagtaaacatgttccgttggaaatgttaccgatttggg  
tattaagggatttgagctacacttcatltaacaagcgacatgattatgtgcaaaaaatgaaaagtctttttatacaaaaataatcattcatca  
tattccgtgcaacggttacccgggtcataatggaagacaagagggctcgatgtaacaaagagcttgatcaacaacagggaaatgaaaatcatttctatt  
cataaaaattatcaaaaagaaaacaattgctcacataaaggcacattcacagcaatgatcccattgatcctggtaccaatggctgtaattcattgaa  
aatctgttggaaagattccacaacataccccctgaacaatttgccccattagcataagggttgaactgataagcatcagactgtaaacatgtgagc  
agtaaaaattactcaatcgagcaacacagcgggtcaatcaactgatcgtttagacgaatcgattcgggtgatagcagaatcgtggaatcagcaaaa  
tgacttataaaaagcgatccttcgcccaccagaaggcacattcgagcttggagtgcaatcaaagcatccgggcatctgagaacaaccgaacc  
**GTTTAAACATGAACTTCTCCAAGATCTTCATCTTTGTGCTGCTGGCAGTGCTGTTGCTCTGCAGT**CAGACGGAAAGCGGCTGGATTAACGAAGAGA  
AGATTGAGAAAAAGATTGACGAACGGATGGGCAACACGGTCTGGGTGCGATGGCGAAAGCGATTGTGCATAAAATGGCCAAGAACGAATTCAGT  
GCATGGCGAACATGGATATGCTGGGCAATTGCGAGAAACACTGTGACAGCAGCGCGAAAAAGGCTACTGTGACGGCACCAAGTGTAAATGCGGCA  
CCCCCTGTCTTAT**ACTAGT**gggtgggtgggttcgggtgggtgggttcgggtgggtgggttcgaagcaggtgaagctgcacagagtcgggtccgg  
agctgaagaagccgggtgagacggtgaagatctcgtgcaaggcctcgggttacacggttcacgaactacgggtatcaactgggtgaagctggccccgg  
gtaagggtctgaagtggtggttggatcaacacgatcaggaagagccgacgctggccgaagaattcaggggtcgtctcgcttctcgttgaaa  
cgtcggccagcagcggcctacctgcagatcaacaacctgaagaacagaggatacggccacgtacttctgcgcccgggtagcgaattcggtcgctgg  
tgtactgggtcagggatcagcgggtgacgggtgctcgggtgggtgggttcggatataccagatgacgcagtcgcccgtcgtcgtcgtcggcctgc  
tgggtgatcgcgtgacgatcagctgcagcggcagggatcagcaactacctgaaactggtaccagcagaagccggatggtacggtgaagctgc  
tgatctctacacgctcagcgtgactcgggtgtgcccgtcgcgcttcacgggtagcgggttcgggtacggattactcgtcagcagatcagcaacctg  
aaccggaagatatacgccagctactactgccagcagtagcagccgcttcccgtacgtgttcgggtgggtgacgaagctggaaatcaagcgcgccc  
cc**GCGGCCGACAGGTGCGCCGGTGCCGTATCCGGATCCGCTGGAACCGCGTGCCGCATAG**CTCGAGaaaagcacaacccaatcgaaaaaccaaa  
aatgaaccatttgtaaaaatcagcattcagaaaatgtcaaaaaatggaggagatattataataaaaatgaaaatttcgagtaaaaattattgtga



gcgtttctgttgattactcttcttgacaatatgaccaactgacgactatacttcccaccagcaagaagggttttcatgtcgttttgccggtct  
ttcacacaaaactaccgcatcgattcttttctgctggcgacgattaatatacagttaaaggtgacctcctccggctGGCGGCC

AscI: GGCGGCC; PmeI: GTTTAAAC SpeI: ACTAGT XhoI: CTCGAG AsVg promoter: tgtaca...ccacc  
AsVg 5'-UTR: agaagg.....aacc CecA-sp: ATGAAC.....CAGACGGAAGCG Scorpine: GGCTGGATT...TCTTAT  
15aa: ggtggtggtggttccgggtggtggtggttccgggtggtggttccg; 5aa: ggtggtggtggttccg  
V<sub>H</sub> starts: aagcag V<sub>L</sub> starts: gatatc  
AsVg 3'UTR: aaagccaa.....ttataataa AsVg 3'300 bp termination seq: aatgaa.....ccggtc  
CecA: also named as Cec1, AGAP000693-RA

### > *AsVg-CecC-ScFv-3'UTR*

GGCGGCCtgtacatggtaaagcaatctgacgatagtgtaaacggagttggtgagattgtaaacaggaattcaacgaaacagcagcagggaaatggt  
agcataccaccacctacgacaatattgcgatttgggttgggttttatataatcagagaggacatattaagccttaaagtctgagctgagcaccacaaac  
ggatgggtggaagtgaatagctgttggtaattctacttcttctgataataaatcaagtaaacatggttccggttgaagtgtttaccgattttggg  
tattaagggatttgagctacacttcatltaacaagcgacatgattatttgcacaaaaaatgaaaagtctttttatacaaaaataatcattcatca  
tattccgtgcaacggttacccgggtcatatggaagacaagagggtcgcgatgtaacaaagagcttgatcaacaacgaggaatgaaaatcattttcatt  
cataaaaaattatcaaaagaaaacaattgctcacataaaggcacattcagcaatgatccattgatcctgggtaccaatgggtgtaattcattgaa  
aatctgttggagattccacaacataccccctgaacaatttggccattagcataaggggtgaaactgataagcatcagactgtaaacatgtgagc  
agtaaaaaattactcaatcgagcaacacagcgggtcaatcaactgatcgtttagacgaatcgattcgggtgatagcagaatcgtggaatcagcaaaat  
tgacttataaaaaggcgatccttcgcccaccagaaggcacattcgagcttggagtgaatcaaaagcatccgggcattctgagaacaaccgaacc  
GTTTAAACATGAACCTACCAAGCTGTCATCCTGGTGGCGATTGCGGTCCTGGTGGTCGTTGGCGTACAGCCAGTCGATGGTGCCTCCGGTGGG  
AGTTCGGCAAGCGGTTGGAGAAGCTCGGACGCAATGTGTTTCGGGCGGCTAAGAAAGCGCTGCCCGTATTGCGGCTACAAAGCTCTGGAACTA  
GTggtggtggtGggttccgggtggtggttccgggtggtggttccgaagcagggtgaaagctgacagagtcgggtccggagctgaagaagccgggt  
gagacggtgaaagatctctgtgcaaggcctcgggttacacgttcacgaactacggtatcaactgggtgaaagctggccccgggtgaaaggtctgaagtg  
atgggttggatcaacacgatcacggaagagccgacgctggccaagaattcacgggtcgcttcgccttctctgctgaaacgtccgcccagcagcggc  
tacctgcaagatcaacaacctgaagaacgaggatcaggccacttctcgcgcccggtagcgaattcggtcgctggtgactggggtcaggggt  
acgacggtgacggtgctcgtcgggtggtggttccggatccagatgacgcagtcgctcgctgctcgcctcgtggtgatcgctgacg  
atcagctgcagcgcagccagcagggtatcagcaactacctgaactggtaccagcagaagccggatggtacgggtgaaagctgctgatcttctacacgctc  
acgctgactcgggtgctcgcgctcagcggtagcgggtcgggtacggattactcgtgacgatcagcaacctgaaacgggaagatcgcg  
acgtactactgcagcagtagcgcgcttccgtagctgttccgggtggtgtagaagctgaaatcaagcgccccgcccGCGGCCGAGGTGCG  
CCGGTGCCTATCCGGATCCGCTGGAACCGGTCGCCGATAGCTCGAGaaagccaaacccaaatcgaaaaaccaaataatgaaaccatttgtaaa  
aacatgattcagaaaatgtacaaaaaatggaggagtattataataaaaatgaaaatttgcagtaaaaaatattgtgagcgttttctgttgatta  
ctcttcttgacaatatgaccaaaactgacgactatacttcccaccagcaagaagggttttcatgtcgttttccgggtctttcacacaaaactaccg  
ccatcggattcttttctgctggcgacgattaatatacagttaaaggtgacctcctccggctGGCGGCC

CecC: also called Cec3, AGAP000694-RA  
CecC-SP: ATGAACCTACCAAGCTGTCATCCTGGTGGCGATTGCGGTCCTGGTGGTCGTTGGCGTACAGCCAGTCGATGGT

### > *AsVg-PLA2-ScFv-3'UTR*

GGCGGCCtgtacatggtaaagcaatctgacgatagtgtaaacggagttggtgagattgtaaacaggaattcaacgaaacagcagcagggaaatggt  
agcataccaccacctacgacaatattgcgatttgggttgggttttatataatcagagaggacatattaagccttaaagtctgagctgagcaccacaaac  
ggatgggtggaagtgaatagctgttggtaattctacttcttctgataataaatcaagtaaacatggttccggttgaagtgtttaccgattttggg  
tattaagggatttgagctacacttcatltaacaagcgacatgattatttgcacaaaaaatgaaaagtctttttatacaaaaataatcattcatca  
tattccgtgcaacggttacccgggtcatatggaagacaagagggtcgcgatgtaacaaagagcttgatcaacaacgaggaatgaaaatcattttcatt  
cataaaaaattatcaaaagaaaacaattgctcacataaaggcacattcagcaatgatccattgatcctgggtaccaatgggtgtaattcattgaa  
aatctgttggagattccacaacataccccctgaacaatttggccattagcataaggggtgaaactgataagcatcagactgtaaacatgtgagc  
agtaaaaaattactcaatcgagcaacacagcgggtcaatcaactgatcgtttagacgaatcgattcgggtgatagcagaatcgtggaatcagcaaaat  
tgacttataaaaaggcgatccttcgcccaccagaaggcacattcgagcttggagtgaatcaaaagcatccgggcattctgagaacaaccgaacc  
GTTTAAACatgcaagtcggttctcggtccttctcctcctcctcctcctacctctcaccggtggcaaatcagggataggatcggggataacgagt  
tggaggaacggataatataatccaggaacggttatgggtcgggcatggttaacaagtcgctccggcccgaacagagctaggtcggttcaagcacacggatg  
catgctgtcgaacccacgacatggtgcccgacgtgatgacgctggtgaatcgaagcagcggctgaccaaacacggcctcccacaccaggttctcgt  
gcgactgcgacgacaagtctcattgattgtcttaaaaaatccggcgacacgattagctcgtatttccgtagggaaagatgtacttcaatctgatagaca  
cgaaggtttacaaactggagcatcctgtcaccgggtgctgtagagaaccgagggctggttcttctactacaccgtggacaaaagcaaacgaaag

tgtaccaaACTAGTgggtggtggtgggttcgggtggtggtgggttcgggtggtggtgggttcgaagcaggtgaagctgcacgagtcgggtccggagctga  
agaagccgggtgagacggtgaagatctcgtgcaaggcctcgggttacacggttcacgaactacggtatcaactgggtgaagctggccccgggtaagg  
gtctgaagtggatgggttggatcaacacgatcaggaagagccgacgctggccgaagaattcacgggtcgcttcgccttctcgtggaacgtcgg  
ccagcacggcctacctgcagatcaacaacctgaagaacgaggatacggccacgtacttctgcgcccggtagcgaattcgggtcgctggtgtact  
ggggtcagggtagcagcgtgacggtgtcgtcgggtggtggttcggatataccagatgacgcagtcgccgtcgtcgtgctggcctcgtgggtg  
atcgcgtgacgatcagctgcagcggccagccagggatcagcaactacctgaactggtaccagcagaagccggatggtacgggtgaagctgctgatct  
tctacacgtcgacgctgtactcgggtgtgccgtcgcgcttcagcggtagcgggttcgggtacggattactcgtgacgatcagcaacctggaaccgg  
aagatatacgccactactgcccagcagtagcggcgttcccgtacgtgttcgggtggtggtacgaagctggaatcaagcgcgcgcggccCGGG  
CCGCAGGTGCGCCGGTGCCGTATCCGGATCCGCTGGAACCGCGTGCCGCATAGCTCGAGaaagccaaacccaatcgaaaaacaaaacaaatgaa  
ccatttgtaaaaacatgcattcagaaaatgtacaaaaaatggaggagtattataataaaatgaaaatttcagtaaaaattattgtgagcgttt  
tctggtgattactcttcttgacaatatgaccaaactgacgactatacttcccaccagcaagaagggttttcatgctgtttgcgggtctttcaca  
caaaactaccgccatcggattcttttctggtgacgattaaatatacagttaaggtgacctcctccggctGGCGCGCC

*Apis mellifera* phospholipase A2 (Pla2) Accession NM\_001011614 XM\_391951

PLA2: atgcaagtc.....gtgtaccaa PLA2-SP: atgcaagtc.....tctcacgga
